# Supplementary material for: Hierarchical Ni(OH)2–MnO2hollow spheres as an electrode material for high-performance supercapacitors
Source: Royal Society of Chemistry journal article supplement (doi:10.1039/d2qi00780k), 2022-01-01
Supplement: d2qi00780k1.pdf [file d2qi00780k1.pdf]

## Supporting Information

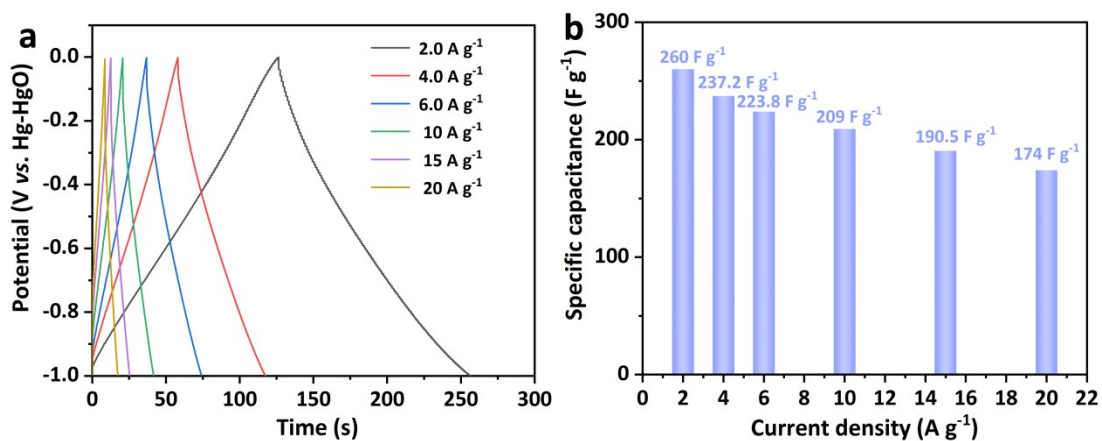

**Fig. S1.** Electrochemical performance of the AC: (a) GCD curves at various current densities, (b) The specific capacitance *versus* various current densities.

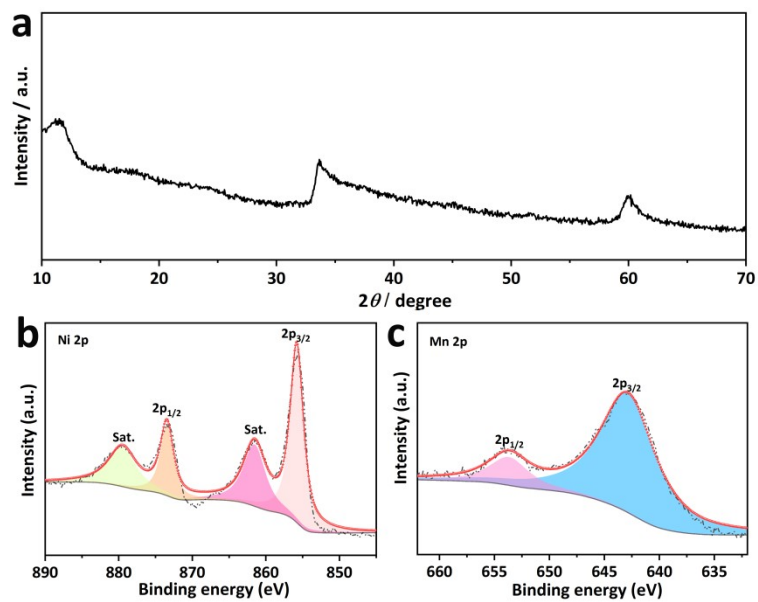

**Fig. S2.** (a) XRD pattern, (b) Ni 2p and (c) Mn 2p XPS spectra of hierarchical Ni-Mn hydroxide hollow sphere.

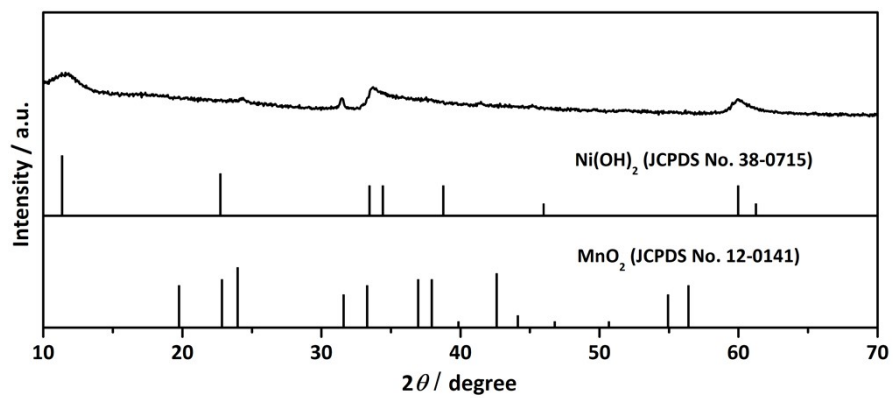

**Fig. S3.** XRD pattern of hierarchical  $\text{Ni(OH)}_2\text{-MnO}_2$  hydroxide hollow sphere.
